# Supplementary material for: Performance evaluation of the Simtomax® CoronaCheck rapid diagnostic test
Source: bioRxiv or medRxiv preprint supplement (doi:10.1101/2020.10.28.20219667), 2020-11-01
Supplement: Supplementary file [file media-1.pdf]

**Performance evaluation of the Simtomax® CoronaCheck rapid diagnostic test**

**Supplementary Material**

**RT-PCR Positive samples**

| <b>Sample #</b> | <b>Age Range (gender)</b> | <b>DPS</b> | <b>IgG</b> | <b>IgM</b> | <b>Elecsys® Anti-SARS-CoV-2 total Ig (COI)</b> |
|-----------------|---------------------------|------------|------------|------------|------------------------------------------------|
| 1               | >50 (F)                   | 180        | POS        | NEG        | NT                                             |
| 2               | >50 (M)                   | 170        | POS        | NEG        | NT                                             |
| 3               | <20 (F)                   | 57         | POS        | NEG        | NT                                             |
| 4               | >50 (F)                   | 15         | POS        | NEG        | NT                                             |
| 5               | >50 (F)                   | 22         | POS        | POS        | NT                                             |
| 6               | >50 (F)                   | 14         | POS        | NEG        | NT                                             |
| 7               | 30-40 (M)                 | 17         | POS        | NEG        | NT                                             |
| 8               | >50 (M)                   | 19         | POS        | NEG        | NT                                             |
| 9               | 30-40 (M)                 | 19         | POS        | NEG        | NT                                             |
| 10              | >50 (F)                   | 17         | POS        | NEG        | NT                                             |
| 11              | 20-30 (F)                 | 20         | POS        | NEG        | NT                                             |
| 12              | >50 (F)                   | 21         | POS        | NEG        | NT                                             |
| 13              | >50 (M)                   | 11         | POS        | NEG        | NT                                             |
| 14              | 30-40 (F)                 | 36         | POS        | POS        | NT                                             |
| 15              | 40-50 (M)                 | 19         | POS        | NEG        | NT                                             |
| 16              | 20-30 (F)                 | 16         | <b>NEG</b> | <b>NEG</b> | NT                                             |
| 17              | 20-30 (F)                 | 30         | POS        | NEG        | NT                                             |
| 18              | 30-40 (F)                 | 24         | POS        | NEG        | NT                                             |
| 19              | >50 (M)                   | 14         | <b>NEG</b> | <b>NEG</b> | NT                                             |
| 20              | >50 (F)                   | 27         | POS        | POS        | NT                                             |
| 21              | 40-50 (F)                 | 21         | POS        | NEG        | NT                                             |
| 22              | 20-30 (F)                 | 22         | POS        | POS        | NT                                             |
| 23              | >50 (M)                   | 18         | POS        | NEG        | NT                                             |
| 24              | >50 (M)                   | 16         | POS        | NEG        | NT                                             |
| 25              | >50 (M)                   | 36         | POS        | POS        | NT                                             |
| 26              | >50 (M)                   | 39         | POS        | POS        | 180,9                                          |
| 27              | <20 (M)                   | 22         | POS        | NEG        | 169,6                                          |
| 28              | 20-30 (F)                 | 35         | POS        | POS        | 154,2                                          |
| 29              | <20 (M)                   | 34         | POS        | NEG        | 130,8                                          |
| 30              | >50 (F)                   | 27         | POS        | NEG        | 126,7                                          |
| 31              | <20 (M)                   | 20         | POS        | POS        | 114,9                                          |
| 32              | 30-40 (M)                 | 41         | POS        | POS        | 107,7                                          |
| 33              | >50 (M)                   | 14         | POS        | POS        | 91,45                                          |
| 34              | 30-40 (M)                 | 28         | POS        | NEG        | 89,2                                           |
| 35              | >50 (M)                   | 33         | POS        | POS        | 85,5                                           |
| 36              | <20 (F)                   | 41         | POS        | POS        | 76,85                                          |
| 37              | <20 (M)                   | 27         | POS        | NEG        | 63,4                                           |
| 38              | 30-40 (F)                 | 32         | POS        | NEG        | 58,6                                           |
| 39              | >50 (M)                   | 10         | POS        | POS        | 51,1                                           |
| 40              | >50 (M)                   | 16         | NEG        | POS        | 49,05                                          |

|    |           |    |            |            |       |
|----|-----------|----|------------|------------|-------|
| 41 | 40-50 (M) | 20 | POS        | POS        | 42,2  |
| 42 | >50 (F)   | 19 | POS        | POS        | 36,9  |
| 43 | >50 (F)   | 17 | POS        | NEG        | 20,16 |
| 44 | 30-40 (F) | 24 | POS        | NEG        | 10,1  |
| 45 | >50 (F)   | 15 | NEG        | POS        | 4,98  |
| 46 | >50 (M)   | 26 | POS        | NEG        | 2,06  |
| 47 | 40-50 (M) | 13 | <b>NEG</b> | <b>NEG</b> | 1,43  |
| 48 | 30-40 (F) | 10 | <b>NEG</b> | <b>NEG</b> | 1,19  |

NT: not tested

### Control Group Samples

| Sample # | Age (gender) | IgG | IgM |
|----------|--------------|-----|-----|
| 1        | 20-30 (M)    | NEG | NEG |
| 2        | 20-30 (M)    | NEG | NEG |
| 3        | >50 (M)      | NEG | NEG |
| 4        | 40-50 (F)    | NEG | NEG |
| 5        | >50 (F)      | NEG | NEG |
| 6        | 20-30 (F)    | NEG | POS |
| 7        | 30-40 (M)    | NEG | NEG |
| 8        | >50 (M)      | NEG | NEG |
| 9        | 20-30 (M)    | NEG | NEG |
| 10       | 40-50 (M)    | NEG | NEG |
| 11       | 40-50 (F)    | NEG | NEG |
| 12       | 20-30 (M)    | NEG | NEG |
| 13       | 20-30 (F)    | NEG | NEG |
| 14       | 30-40 (F)    | NEG | NEG |
| 15       | 20-30 (M)    | NEG | NEG |
| 16       | >50 (F)      | NEG | NEG |
| 17       | >50 (F)      | NEG | NEG |
| 18       | 40-50 (F)    | NEG | NEG |
| 19       | 30-40 (M)    | NEG | NEG |
| 20       | 40-50 (F)    | NEG | NEG |
| 21       | 30-40 (F)    | NEG | NEG |
| 22       | >50 (M)      | NEG | NEG |
| 23       | 30-40 (M)    | NEG | NEG |
| 24       | 20-30 (M)    | NEG | NEG |
| 25       | 40-50 (M)    | NEG | NEG |
| 26       | >50 (F)      | NEG | NEG |
| 27       | 20-30 (F)    | NEG | NEG |
| 28       | 20-30 (F)    | NEG | NEG |
| 29       | 30-40 (M)    | NEG | NEG |
| 30       | 30-40 (F)    | NEG | NEG |
| 31       | 30-40 (M)    | NEG | NEG |
| 32       | 30-40 (M)    | NEG | NEG |
| 33       | 30-40 (F)    | NEG | NEG |
| 34       | 40-50 (M)    | NEG | NEG |
| 35       | 30-40 (F)    | NEG | NEG |
| 36       | 30-40 (M)    | NEG | NEG |
| 37       | 20-30 (F)    | NEG | NEG |

|    |           |     |     |
|----|-----------|-----|-----|
| 38 | 20-30 (F) | NEG | NEG |
| 39 | 30-40 (M) | NEG | NEG |
| 40 | >50 (M)   | NEG | NEG |
| 41 | >50 (F)   | NEG | NEG |
| 42 | >50 (M)   | NEG | NEG |
| 43 | 20-30 (M) | NEG | NEG |
| 44 | >50 (M)   | NEG | NEG |
| 45 | 30-40 (M) | NEG | NEG |
| 46 | >50 (M)   | NEG | NEG |
| 47 | >50 (F)   | NEG | NEG |
| 48 | >50 (F)   | NEG | NEG |
| 49 | 30-40 (M) | NEG | NEG |
| 50 | 20-30 (F) | NEG | NEG |
| 51 | 30-40 (F) | NEG | NEG |
| 52 | 40-50 (F) | NEG | NEG |
| 53 | 30-40 (F) | NEG | NEG |
| 54 | 40-50 (F) | NEG | NEG |
| 55 | 30-40 (M) | NEG | NEG |
| 56 | >50 (M)   | NEG | NEG |
| 57 | 40-50 (F) | NEG | NEG |
| 58 | >50 (M)   | NEG | POS |
| 59 | 20-30 (M) | NEG | NEG |
| 60 | 30-40 (F) | NEG | NEG |
| 61 | 30-40 (M) | NEG | NEG |
| 62 | 40-50 (M) | NEG | NEG |
| 63 | >50 (M)   | NEG | NEG |
| 64 | 30-40 (F) | NEG | NEG |
| 65 | 30-40 (F) | NEG | NEG |
| 66 | >50 (F)   | NEG | NEG |
| 67 | 40-50 (M) | NEG | NEG |
| 68 | <20 (F)   | NEG | NEG |
| 69 | 20-30 (F) | NEG | NEG |
| 70 | 30-40 (F) | NEG | NEG |
| 71 | 30-40 (F) | NEG | NEG |
| 72 | 30-40 (M) | NEG | NEG |
| 73 | >50 (F)   | NEG | NEG |
| 74 | 30-40 (F) | NEG | NEG |
| 75 | <20 (M)   | NEG | NEG |
| 76 | >50 (F)   | NEG | NEG |
| 77 | 40-50 (M) | NEG | NEG |
| 78 | 40-50 (F) | NEG | NEG |
| 79 | 30-40 (M) | NEG | NEG |
| 80 | >50 (F)   | NEG | NEG |
| 81 | 20-30 (M) | NEG | NEG |
| 82 | >50 (F)   | NEG | NEG |
| 83 | 20-30 (F) | NEG | NEG |
| 84 | 40-50 (F) | NEG | POS |
| 85 | >50 (F)   | NEG | NEG |

|    |           |     |     |
|----|-----------|-----|-----|
| 86 | 40-50 (M) | NEG | NEG |
| 87 | 40-50 (M) | NEG | NEG |
| 88 | >50 (M)   | NEG | NEG |
| 89 | 30-40 (F) | NEG | NEG |
| 90 | 20-30 (F) | NEG | NEG |
| 91 | >50 (M)   | NEG | NEG |
| 92 | 30-40 (M) | NEG | NEG |
| 93 | >50 (F)   | NEG | NEG |
| 94 | 40-50 (F) | NEG | NEG |
| 95 | 40-50 (F) | NEG | NEG |
| 96 | >50 (M)   | NEG | NEG |
| 97 | >50 (M)   | NEG | NEG |
| 98 | 20-30 (F) | NEG | NEG |

na: unknown
